# Supplementary material for: Cardioprotective effects of high-altitude adaptation in cardiac surgical patients: a retrospective cohort study with propensity score matching
Source: PubMed Central journal article supplement (PMC11019029; doi:10.3389/fcvm.2024.1347552), 2024-04-02
Supplement: Table1.pdf [file Table1.pdf]

**Table S1**

Analysis of demographic and clinical characteristics before and after propensity score matching.

| Group                              | Before matching            |                            | After matching            |                            | Before matching |        | After matching |       |
|------------------------------------|----------------------------|----------------------------|---------------------------|----------------------------|-----------------|--------|----------------|-------|
|                                    | Low altitude<br>(n = 2641) | High altitude<br>(n = 379) | Low altitude<br>(n = 751) | High altitude<br>(n = 377) | <i>P</i> value  | SMD    | <i>P</i> value | SMD   |
| <b>Demographic characteristics</b> |                            |                            |                           |                            |                 |        |                |       |
| Age (years)                        | 51.5 ± 12.3                | 46.7 ± 13.2                | 46.5 ± 13.2               | 46.7 ± 13.1                | < 0.001         | -0.363 | 0.89           | 0.014 |
| Gender                             |                            |                            |                           |                            | 0.014           | 0.139  | 0.78           | 0.019 |
| Female                             | 1474<br>(55.8)             | 237<br>(62.5)              | 461<br>(61.4)             | 235<br>(62.3)              |                 |        |                |       |
| Male                               | 1167<br>(44.2)             | 142<br>(37.5)              | 290<br>(38.6)             | 142<br>(37.7)              |                 |        |                |       |
| BMI (kg/m <sup>2</sup> )           | 22.8 ± 3.4                 | 23.0 ± 3.6                 | 22.9 ± 3.6                | 23.0 ± 3.5                 | 0.19            | 0.068  | 0.74           | 0.023 |
| <b>Principal diagnosis</b>         |                            |                            |                           |                            |                 |        |                |       |
| Valvular heart disease             | 1155<br>(43.7)             | 139<br>(36.7)              | 261<br>(34.8)             | 139<br>(36.9)              | 0.009           | -0.146 | 0.48           | 0.047 |
| Coronary artery disease            | 405<br>(15.3)              | 49<br>(12.9)               | 93<br>(12.4)              | 48<br>(12.7)               | 0.22            | -0.072 | 0.87           | 0.012 |
| Congenital heart disease           | 438<br>(16.6)              | 115<br>(30.3)              | 220<br>(29.3)             | 114<br>(30.2)              | <0.001          | 0.299  | 0.74           | 0.017 |

|                             |                        |                        |                        |                        |        |        |      |        |
|-----------------------------|------------------------|------------------------|------------------------|------------------------|--------|--------|------|--------|
| Aortic disease              | 152<br>(5.7)           | 27 (7.1)               | 47 (6.3)               | 27 (7.2)               | 0.44   | 0.023  | 0.22 | -0.059 |
| Others                      | 721<br>(27.3)          | 82<br>(21.6)           | 182<br>(24.3)          | 82<br>(21.8)           | 0.02   | -0.137 | 0.35 | 0.058  |
| LVEF (%)                    | 62.6 ±<br>10.2         | 62.7 ±<br>9.0          | 62.7 ±<br>10.0         | 62.7 ±<br>9.0          | 0.89   | 0.009  | 0.99 | -0.001 |
| Preoperative<br>CK-MB (U/L) | 11.1<br>(9.0,<br>14.6) | 11.3<br>(9.0,<br>15.0) | 11.1<br>(9.0,<br>14.0) | 11.3<br>(9.0,<br>15.0) | 0.21   | 0.032  | 0.41 | -0.017 |
| EuroSCORE II                | 1.76 ±<br>1.66         | 1.50 ±<br>1.45         | 1.58 ±<br>1.46         | 1.50 ±<br>1.46         | 0.004  | -0.177 | 0.40 | -0.051 |
| Operation<br>duration (min) | 314 ±<br>94            | 306 ±<br>83            | 309 ±<br>98            | 307 ±<br>83            | 0.14   | -0.090 | 0.70 | -0.034 |
| CPB duration<br>(min)       | 136 ±<br>57            | 124 ±<br>47            | 125 ±<br>52            | 124 ±<br>47            | <0.001 | -0.268 | 0.76 | -0.017 |
| Cross-clamp<br>time (min)   | 91 ± 41                | 83 ± 37                | 83 ± 39                | 83 ± 37                | <0.001 | -0.228 | 0.97 | -0.002 |

Data are displayed as mean ± standard deviation, median (25<sup>th</sup> percentile, 75<sup>th</sup> percentile), or number (%). Abbreviations: SMD, standardized mean difference; BMI, body mass index; LVEF, left ventricular ejection fraction; CK-MB, creatinine kinase muscle-brain isoenzymes; EuroSCORE II, European System for Cardiac Operative Risk Evaluation II.
