# Supplementary material for: Cardioprotective effects of high-altitude adaptation in cardiac surgical patients: a retrospective cohort study with propensity score matching
Source: PubMed Central journal article supplement (PMC11019029; doi:10.3389/fcvm.2024.1347552), 2024-04-02
Supplement: Table2.pdf [file Table2.pdf]

**Table S2**

Comparison of surgical data between the low-altitude and high-altitude groups after propensity score matching.

| Group                    | Low altitude<br>(n = 751) | High altitude<br>(n = 377) | <i>P</i> value |
|--------------------------|---------------------------|----------------------------|----------------|
| Major procedures         |                           |                            |                |
| Aortic valve replacement | 324 (43.1)                | 178 (47.2)                 | 0.19           |
| Mitral valve replacement | 323 (43.0)                | 176 (46.7)                 | 0.24           |
| Mitral valve plasty      | 99 (13.2)                 | 55 (14.6)                  | 0.52           |
| Tricuspid valve plasty   | 505 (67.2)                | 273 (72.4)                 | 0.078          |
| CABG                     | 109 (14.5)                | 53 (14.1)                  | 0.84           |
| ASD repair               | 112 (14.9)                | 71 (18.8)                  | 0.092          |
| VSD repair               | 47 (6.3)                  | 14 (3.7)                   | 0.075          |
| Aortic surgery           | 53 (7.1)                  | 37 (9.8)                   | 0.11           |

Data are displayed as number (%). Abbreviations: CABG, coronary artery bypass grafting; ASD, atrial septal defect; VSD, ventricular septal defect.
