# Supplementary material for: Cardioprotective effects of high-altitude adaptation in cardiac surgical patients: a retrospective cohort study with propensity score matching
Source: PubMed Central journal article supplement (PMC11019029; doi:10.3389/fcvm.2024.1347552), 2024-04-02
Supplement: Table3.pdf [file Table3.pdf]

**Table S3**

Comparison of outcomes of the low-altitude and high-altitude groups after propensity score matching.

| Group                        | Low altitude<br>(n = 751) | High altitude<br>(n = 377) | <i>P</i> value | Phi/Cohen d |
|------------------------------|---------------------------|----------------------------|----------------|-------------|
| MACEs                        | 90 (12.0)                 | 25 (6.6)                   | 0.005          | 0.183       |
| Myocardial infarction        | 2 (0.3)                   | 1 (0.3)                    | 1.0            | 0.00        |
| Cardiac arrest               | 34 (4.5)                  | 6 (1.6)                    | 0.012          | 0.175       |
| ECMO                         | 2 (0.3)                   | 0 (0.0)                    | 0.32           | 0.030       |
| IABP                         | 75 (10.0)                 | 22 (5.8)                   | 0.019          | 0.170       |
| In-hospital death            | 19 (2.5)                  | 5 (1.3)                    | 0.19           | 0.039       |
| Postoperative CK-MB<br>(U/L) | 71.0 (50.4, 95.8)         | 66.5 (47.9, 89.0)          | 0.003          | 42.4        |
| MV time                      | 14.6 (7.5, 24.5)          | 14.8 (8.0, 26.1)           | 0.91           | 45.8        |
| ICU length of stay           | 38.8 (20.5, 87.3)         | 41.4 (21.0, 95.6)          | 0.44           | 80.5        |
| In-hospital length of stay   | 13.4 ± 9.3                | 13.7 ± 9.9                 | 0.33           | 9.5         |

Data are displayed as mean ± standard deviation, median (25<sup>th</sup> percentile, 75<sup>th</sup> percentile), or number (%). Abbreviations: MACEs, major adverse cardiovascular events; IABP, intra-aortic balloon pump; ECMO, extracorporeal membrane oxygenation; CK-MB, creatinine kinase muscle-brain isoenzymes; CPB, cardiopulmonary bypass; ICU, intensive care unit.
